# Supplementary material
Source: PubMed Central journal article supplement (PMC3633690)
Supplement: NIHMS458016-supplement-01.pdf [file NIHMS458016-supplement-01.pdf]

Supplemental Figure S1. Engorged ticks injected with dsRNA.

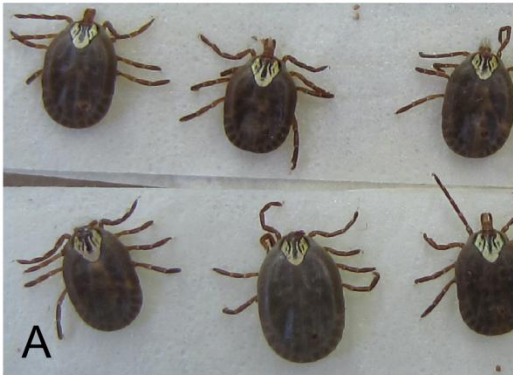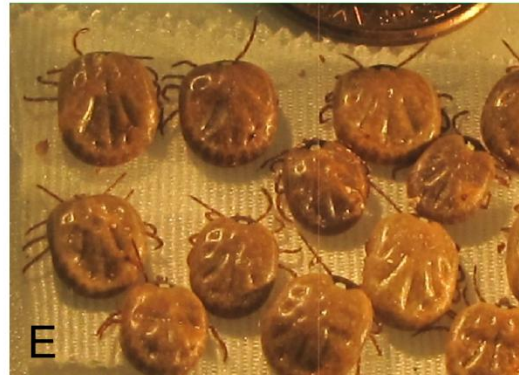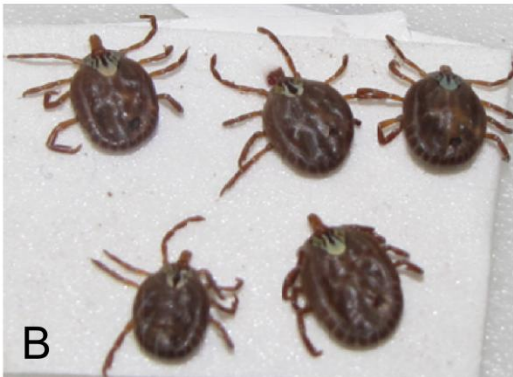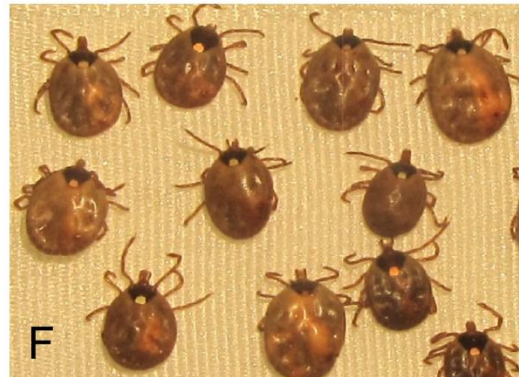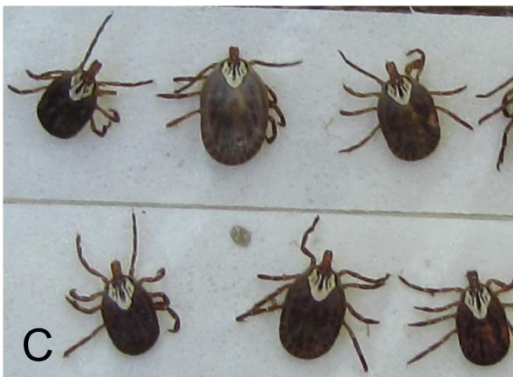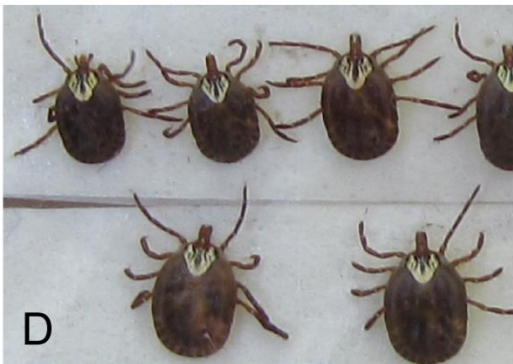

- Ticks were injected with dsRNA to induce RNAi.
- A. *A. maculatum* Control
  - B. *A. maculatum* injected with AmVti1A-dsRNA
  - C. *A. maculatum* injected with AmVti1B-dsRNA
  - D. *A. maculatum* injected with AmVti1A/B-dsRNA
  - E. *A. americanum* Control
  - F. *A. americanum* injected with AaVti1B-dsRNA
